# Supplementary material for: Epithelioid inflammatory myofibroblastic sarcoma with exceptionally long response to lorlatinib—a case report
Source: PubMed Central journal article supplement — Ther Adv Med Oncol. 2024 Nov 20;16:17588359241298489. doi: 10.1177/17588359241298489 (PMC11580051; doi:10.1177/17588359241298489), 2024-11-20
Supplement: sj-pdf-1-tam-10.1177_17588359241298489.pdf [file sj-pdf-1-tam-10.1177_17588359241298489.pdf]

### CARE Checklist of information to include when writing a case report

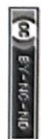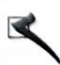

| Topic                    | Item | Checklist item description                                                                                   | Reported on Line                                                    |
|--------------------------|------|--------------------------------------------------------------------------------------------------------------|---------------------------------------------------------------------|
| Title                    | 1    | The diagnosis or intervention of primary focus followed by the words "case report" .....                     | 1-2                                                                 |
|                          | 2    | 2 to 5 key words that identify diagnoses or interventions in this case report, including "case report" ...   | 21-22                                                               |
|                          | 3a   | Introduction: What is unique about this case and what does it add to the scientific literature? .....        | 30-40 6-18                                                          |
|                          | 3b   | Main symptoms and/or important clinical findings .....                                                       | 45 6-18                                                             |
| Abstract (no references) | 3c   | The main diagnoses, therapeutic interventions, and outcomes .....                                            | <del>45</del> 6-18                                                  |
|                          | 3d   | Conclusion—What is the main "take-away" lesson(s) from this case? .....                                      | 6-18                                                                |
| Introduction             | 4    | One or two paragraphs summarizing why this case is unique (may include references) .....                     | 30-40                                                               |
|                          | 5a   | De-identified patient specific information .....                                                             | 44-45                                                               |
| Patient Information      | 5b   | Primary concerns and symptoms of the patient .....                                                           | 45                                                                  |
|                          | 5c   | Medical, family, and psycho-social history including relevant genetic information .....                      | 44-45                                                               |
| Clinical Findings        | 5d   | Relevant past interventions with outcomes .....                                                              | —                                                                   |
|                          | 6    | Describe significant physical examination (PE) and important clinical findings .....                         | 44-45                                                               |
|                          | 7    | Historical and current information from this episode of care organized as a timeline .....                   | Fig. 5                                                              |
|                          | 8a   | Diagnostic testing (such as PE, laboratory testing, imaging, surveys) .....                                  | 47-93                                                               |
|                          | 8b   | Diagnostic challenges (such as access to testing, financial, or cultural) .....                              | 47-93                                                               |
| Therapeutic Intervention | 8c   | Diagnosis (including other diagnoses considered) .....                                                       | 93                                                                  |
|                          | 8d   | Prognosis (such as staging in oncology) where applicable .....                                               | 120 2084                                                            |
|                          | 9a   | Types of therapeutic intervention (such as pharmacologic, surgical, preventive, self-care) .....             | 105-106; 123; 125; 140                                              |
|                          | 9b   | Administration of therapeutic intervention (such as dosage, strength, duration) .....                        | 105-106; 123; 125; 140                                              |
|                          | 9c   | Changes in therapeutic intervention (with rationale) .....                                                   | 156-158                                                             |
| Follow-up and Outcomes   | 10a  | Clinician and patient-assessed outcomes (if available) .....                                                 | 155-158                                                             |
|                          | 10b  | Important follow-up diagnostic and other test results .....                                                  | 44-158                                                              |
|                          | 10c  | Intervention adherence and tolerability (How was this assessed?) .....                                       | 44-158 (holerenu)                                                   |
| Discussion               | 10d  | Adverse and unanticipated events .....                                                                       | 44-158                                                              |
|                          | 11a  | A scientific discussion of the strengths AND limitations associated with this case report .....              | 164-232                                                             |
|                          | 11b  | Discussion of the relevant medical literature with references .....                                          | 164-232                                                             |
|                          | 11c  | The scientific rationale for any conclusions (including assessment of possible causes) .....                 | 215-232                                                             |
| Patient Perspective      | 11d  | The primary "take-away" lessons of this case report (without references) in a one paragraph conclusion ..... | 257-261                                                             |
|                          | 12   | The patient should share their perspective in one to two paragraphs on the treatment(s) they received .....  | 157-158                                                             |
| Informed Consent         | 13   | Did the patient give informed consent? Please provide if requested .....                                     | Yes <input checked="" type="checkbox"/> No <input type="checkbox"/> |
